# Supplementary material for: Nitrogen-doped hierarchically porous carbon as efficient oxygen reduction electrocatalysts in acid electrolyte
Source: Royal Society of Chemistry journal article supplement (doi:10.1039/c4ta03778b), 2014-01-01
Supplement: c4ta03778b1.pdf [file c4ta03778b1.pdf]

## Supporting information

### Effect of pyrolysis gas

From the nitrogen sorption measurement, the BET surface area of the PNCEs-900-NH<sub>3</sub> (719.4 m<sup>2</sup>/g) is significantly higher than that of the PNCEs-900-N<sub>2</sub> (104.08 m<sup>2</sup>/g). Figure S1 displays the pore distribution of the PNCEs-900-NH<sub>3</sub> and PNCEs-900-N<sub>2</sub>. The ratio of macropore and the mesoporous is significantly increased for the PNCE-N<sub>2</sub>. Moreover, the micropores are significantly increased. This proves that the reactions between carbon and NH<sub>3</sub> involve the replacement of oxygen-bearing species by nitrogen-containing groups and the etching of carbon fragments by the radicals generated by the decomposition of NH<sub>3</sub> at high temperatures, which forms more pores in carbon framework.<sup>[1,2]</sup>

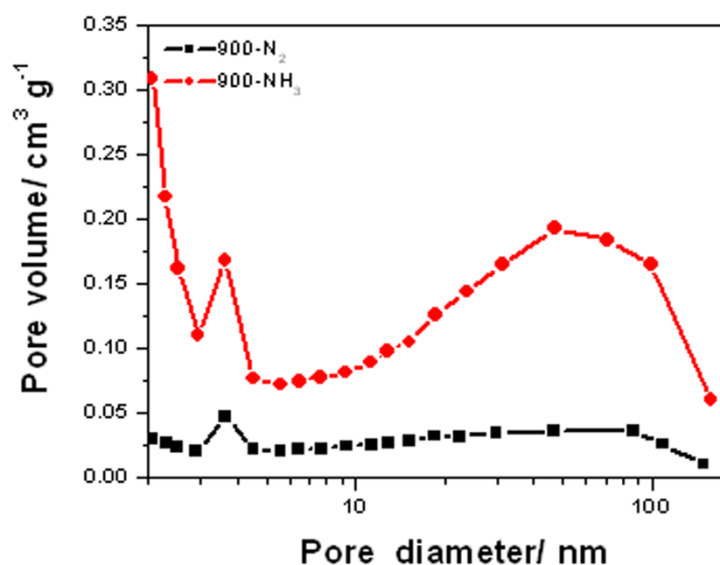

Figure S1. N<sub>2</sub> sorption isotherms of the resultant PNCEs carbon catalysts prepared under different atmosphere;

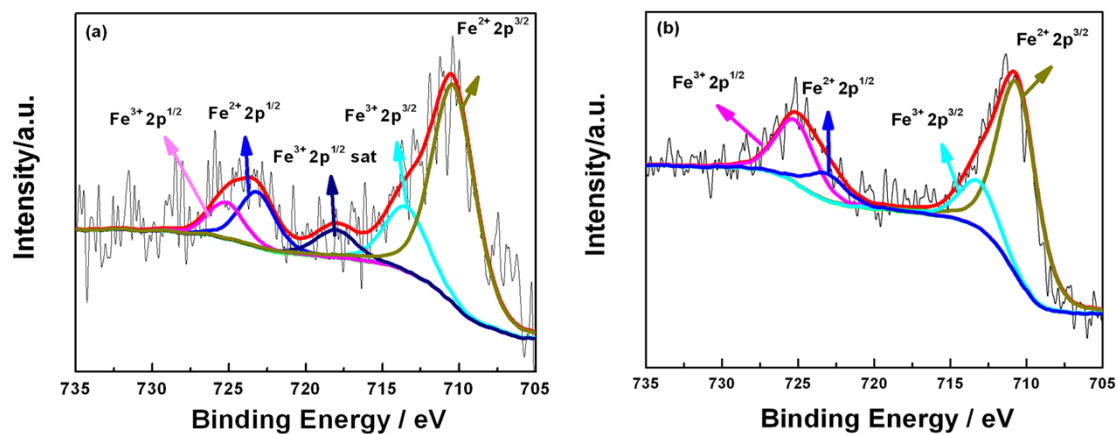

Figure S2. High resolution XPS spectra of Fe 2p N1s (a) PNCEs-1000 (b) NNCEs-1000

Table S1. Physical characteristic of the PNCEs synthesized at different temperature

| Samples    | $S_{\text{BET}}$<br>( $\text{m}^2 \text{g}^{-1}$ ) | $S_{\text{micro}}$<br>( $\text{m}^2 \text{g}^{-1}$ ) | $S_{\text{ext}}$<br>( $\text{m}^2 \text{g}^{-1}$ ) | $V_{\text{micro}}$<br>( $\text{cm}^3/\text{g}$ ) | $V_{\text{t}}$<br>( $\text{cm}^3/\text{g}$ ) |
|------------|----------------------------------------------------|------------------------------------------------------|----------------------------------------------------|--------------------------------------------------|----------------------------------------------|
| PNCEs-700  | 432.7                                              | 334.08                                               | 98.6                                               | 0.154                                            | 0.329                                        |
| PNCEs-800  | 528.2                                              | 378.4                                                | 149.9                                              | 0.173                                            | 0.412                                        |
| PNCEs-900  | 719.4                                              | 497.4                                                | 222                                                | 0.228                                            | 0.553                                        |
| PNCEs-1000 | 924.6                                              | 502.2                                                | 502.17                                             | 0.227                                            | 0.715                                        |
| PNCEs-1100 | 756.6                                              | 263.8                                                | 492.7                                              | 0.117                                            | 0.518                                        |
| NNCEs-1000 | 523                                                | 329.1                                                | 194.03                                             | 0.151                                            | 0.547                                        |

$S_{\text{BET}}$ : Surface area calculated by the Brunauer-Emmet-Teller(BET) method,  $S_{\text{micro}}$ : micropore surface area calculated by t-plot method ;  $S_{\text{ext}}$ : External surface area calculated by t-plot analysis ;  $V_{\text{micro}}$ =micropore volume calculated by t-plot analysis and  $V_{\text{tot}}$ =total pore volume at  $P/P_0=0.995$  ;

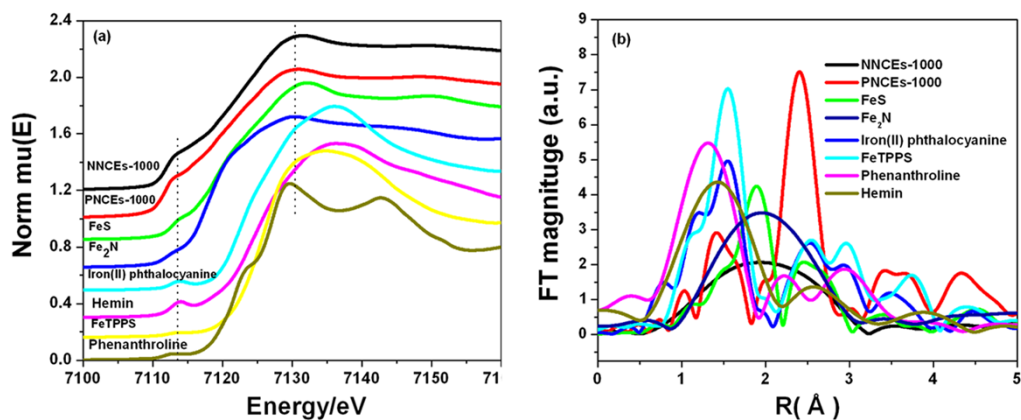

Figure S3. (a) Normalized XANES of NNCEs-1000 and PNCEs-1000 with reference compounds at the Fe K-edge.

(b) Magnitudes of  $k^3$ -weighted Fourier-transformed (phase-uncorrected) EXAFS data for NNCE-1000 and PNCEs-1000 with some reference compounds.

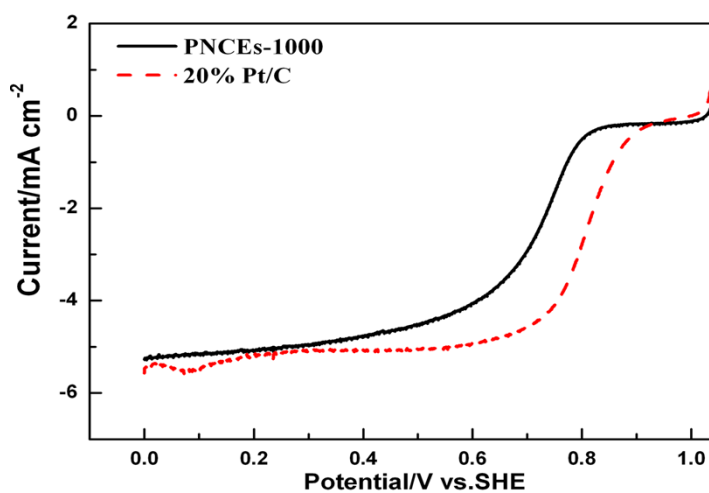

Figure S4. Oxygen reduction polarization curves for the catalysts PNCEs-1000 and 20%Pt/C in  $O_2$ -purged 0.5 M  $H_2SO_4$ ; rotating rate is 1600 rpm. Scan rate= $5\text{ mV s}^{-1}$

## Reference

- [1] Wang, X. Q.; Lee, J. S.; Zhu, Q.; Liu, J.; Wang, Y.; Dai, S., Ammonia-Treated Ordered Mesoporous Carbons as Catalytic Materials for Oxygen Reduction Reaction. *Chemistry of Materials* 22 (7), 2178-2180.

[2] Zhong, H. X.; Zhang, H. M.; Liu, S. S.; Deng, C. W.; Wang, M. R., Nitrogen-Enriched Carbon from Melamine Resins with Superior Oxygen Reduction Reaction Activity. *Chemsuschem* **2013**, *6* (5), 807-812.
